# Supplementary material for: Beyond the Pill: Contextual Effects of Community-Based PrEP Delivery on Pregnancy Risk among FSWs in Cameroon – A Propensity Score-Matched Analysis
Source: Research Square preprint supplement (doi:10.21203/rs.3.rs-7322262/v1), 2025-09-15
Supplement: Supplementary file 1 [file 18f1bb82871d8faadc9be7ba.docx]

**Table A.**

**Sociodemographic characteristics associated with the participants before matching with propensity score.**

|  | **FSWs not on PrEP (n=236)** | | | **FSWs on PrEP**  **(n=248)** | | | **SMD**  **(Effect size)** | **Combined population (N=484)** | | **P** | **Missing value** |
| --- | --- | --- | --- | --- | --- | --- | --- | --- | --- | --- | --- |
| **n (%)** | **95% CI** | | **n (%)** | **95% CI** | | **Median (IQR)** | **n (%)** |
| **lb** | **ub** | **lb** | **ub** |
| Age |  |  |  |  |  |  |  | 24 (22 - 30) |  | **< 0.001**** | 0 |
| < 20 | 41 (17.4) | 12.8 | 22.8 | 0 (0.0) | 0.0 | 1.5 | 0.785 |  | 41 (8.5) |  |
| 20 - 24 | 195 (82.6) | 77.2 | 87.2 | 61 (24.6) | 19.4 | 30.4 |  | 256 (52.9) |  |
| 25 - 29 | 0 (0.0) | 0.0 | 1.6 | 65 (26.2) | 20.8 | 32.1 |  | 65 (13.4) |  |
| 30 - 34 | 0 (0.0) | 0.0 | 1.6 | 38 (15.3) | 11.1 | 20.4 |  | 38 (7.9) |  |
| 35 - 39 | 0 (0.0) | 0.0 | 1.6 | 39 (15.7) | 11.4 | 20.9 |  | 39 (8.1) |  |
| ≥ 40 | 0 (0.0) | 0.0 | 1.6 | 45 (18.1) | 13.6 | 23.5 |  | 45 (9.3) |  |
| Place of residence |  |  |  |  |  |  |  |  |  |  | 0 |
| Yaounde | 87 (36.9) | 30.7 | 43.4 | 94 (37.9) | 31.8 | 44.3 | 0.059 |  | 181 (37.4) | 0.794 |  |
| Douala | 76 (32.2) | 26.3 | 38.6 | 84 (33.9) | 28.0 | 40.1 |  | 160 (33.1) |  |
| Bafoussam | 29 (12.3) | 8.4 | 17.2 | 22 (8.9) | 6.5 | 13.1 |  | 51 (10.5) |  |
| Bertoua | 23 (9.7) | 6.3 | 14.3 | 23 (9.3) | 6.0 | 13.6 |  | 46 (9. |  |
| Bamenda | 21 (8.9) | 5.6 | 13.3 | 25 (10.1) | 6.6 | 14.5 |  | 46 (9.5) |  |
| Education |  |  |  |  |  |  |  |  |  |  | 0 |
| No education | 7 (3.0) | 1.2 | 6.0 | 3 (1.2) | 0.3 | 3.5 | 0.159 |  | 10 (2.1) | **0.006**** |  |
| Primary | 29 (12.3) | 8.4 | 17.2 | 58 (23.4) | 18.3 | 29.2 |  | 87 (18.0) |  |
| Secondary | 156 (66.1) | 59.7 | 72.1 | 153 (61.7) | 55.3 | 67.8 |  | 309 (63.8) |  |
| Tertiary | 44 (18.6) | 13.9 | 24.2 | 34 (13.7) | 9.7 | 18.6 |  | 78 (16.1) |  |
| Cohabiting with sexual partner |  |  |  |  |  |  |  |  |  |  | 2 |
| No | 234 (100.0) | 98.4 | 100 | 209 (84.3) | 79.1 | 88.6 | 0.288 |  | 443 (91.9) | **< 0.001**** |  |
| Yes | 0 (0.0) | 0.0 | 1.6 | 39 (15.7) | 11.4 | 20.9 |  | 39 (8.1) |  |
| A source of income other than prostitution |  |  |  |  |  |  |  |  |  |  | 0 |
| No | 171 (72.5) | 66.3 | 78.1 | 137 (55.2) | 48.8 | 61.5 | 0.179 |  | 308 (63.6) | **< 0.001**** |  |
| Yes | 65 (27.5) | 21.9 | 33.7 | 111 (44.8) | 38.5 | 51.2 |  | 176 (36.4) |  |

**n**: number in category; **N**: total number; **P**: significance; ******: significant at 1%; **CI**: confidence interval; **IQR**: interquartile range; **lb**: lower bound; **ub**: upper bound.

**Table B.**

**The social and behavioural risks associated with the participants before matching with propensity score.**

|  | **FSWs not on PrEP (n=236)** | | | **FSWs on PrEP**  **(n=248)** | | | **SMD**  **(Effect size)** | **Combined population (N=484)** | **P** | **Missing value** |
| --- | --- | --- | --- | --- | --- | --- | --- | --- | --- | --- |
|  | **n (%)** | **95% CI** | | **n (%)** | **95% CI** | | **n (%)** |
| **lb** | **ub** | **lb** | **ub** |
| Affiliation with a sex workers' association |  |  |  |  |  |  |  |  |  | 1 |
| No | 135 (57.2) | 50.6 | 63.6 | 114 (46.2) | 39.8 | 52.6 | 0.111 | 249 (51.6) | **0.015*** |  |
| Yes | 101 (42.8) | 36.4 | 49.4 | 133 (53.8) | 47.4 | 60.2 | 234 (48.4) |  |
| People close to you know about your FSW status |  |  |  |  |  |  |  |  |  | 0 |
| No | 132 (55.9) | 49.3 | 62.4 | 116 (46.8) | 40.4 | 53.2 | 0.092 | 248 (51.2) | **0.044*** |  |
| Yes | 104 (44.1) | 37.6 | 50.7 | 132 (53.2) | 46.8 | 59.6 | 236 (48.8) |  |
| HIV test within the last 12 months |  |  |  |  |  |  |  |  |  | 0 |
| No | 18 (7.6) | 4.6 | 11.8 | 5 (2.0) | 0.7 | 4.6 | 0.132 | 23 (4.8) | **0.004**** |  |
| Yes | 218 (92.4) | 88.2 | 95.4 | 243 (98.0) | 95.4 | 99.3 | 461 (95.2) |  |
| sexual intercourse while intoxicated with psychoactive substances or alcohol. |  |  |  |  |  |  |  |  |  |  |
| No | 89 (37.7) | 31.5 | 44.2 | 84 (33.9) | 28.0 | 40.1 | 0.040 | 173 (35.7) | 0.378 |  |
| Yes | 147 (62.3) | 55.8 | 68.5 | 164 (66.1) | 59.9 | 72.0 | 311 (64.3) |  |
| The abuse of only one psychoactive substance |  |  |  |  |  |  |  |  |  | 0 |
| No | 105 (44.5) | 38.0 | 51.1 | 109 (44.0) | 37.7 | 50.4 | 0.005 | 214 (44.2) | 0.905 |  |
| Yes | 131 (55.5) | 48.9 | 62.0 | 139 (56.0) | 49.6 | 62.3 | 270 (55.8) |  |
| The abuse of at least two psychoactive substances |  |  |  |  |  |  |  |  |  | 0 |
| No | 174 (73.7) | 67.6 | 79.2 | 172 (69.4) | 63.2 | 75.0 | 0.048 | 346 (71.5) | 0.287 |  |
| Yes | 62 (26.3) | 20.8 | 32.4 | 76 (30.6) | 25.0 | 36.8 | 138 (28.5) |  |
| one or more symptoms of sexually transmitted infection (STI) over the past 12 months |  |  |  |  |  |  |  |  |  | 0 |
| No | 63 (26.7) | 21.2 | 32.8 | 68 (27.4) | 22.0 | 33.4 | 0.008 | 131 (27.1) | 0.858 |  |
| Yes | 173 (73.3) | 67.2 | 78.8 | 180 (72.6) | 66.6 | 78.0 | 353 (72.9) |  |
| perceived level of risk of HIV infection |  |  |  |  |  |  |  |  |  | 0 |
| Decreased | 161 (68.2) | 61.9 | 74.1 | 180 (72.6) | 66.6 | 78.0 | 0.048 | 341 (70.5) | 0.293 |  |
| Increased | 75 (31.8) | 25.9 | 38.1 | 68 (27.4) | 22.0 | 33.4 | 143 (29.5) |  |

**n**: number in category; **N**: total number; **P**: significance; ******: significant at 1%; *****: significant at 5%; **CI**: confidence interval; **lb**: lower bound; **ub**: upper bound.

**Table C.**

**Overview of reproductive health variables among participants before matching with propensity score.**

|  | **FSWs not on PrEP (n=236)** | | | **FSWs on PrEP**  **(n=248)** | | | **SMD**  **(Effect size)** | **Combined population (N=484)** | **P** | **Missing value** |
| --- | --- | --- | --- | --- | --- | --- | --- | --- | --- | --- |
|  | **n (%)** | **95% CI** | | **n (%)** | **95% CI** | | **n (%)** |
| **lb** | **ub** | **lb** | **ub** |
| The intention to become pregnant in the previous 12 months. |  |  |  |  |  |  |  |  |  | 0 |
| No | 154 (65.3) | 58.8 | 71..3 | 173 (69.8) | 63.6 | 75.4 | 0.048 | 327 (67.6) | 0.290 |  |
| Yes | 82 (34.7) | 28.7 | 41.2 | 75 (30.2) | 24.6 | 36.4 | 157 (32.4) |  |
| Use of at least one modern contraceptive method over the last 12 months |  |  |  |  |  |  |  |  |  | 0 |
| No | 99 (41.9) | 35.6 | 48.5 | 87 (35.1) | 29.2 | 41.4 | 0.071 | 186 (38.4) | 0.120 |  |
| Yes | 137 (58.1) | 51.5 | 64.4 | 161 (64.9) | 58.6 | 70.8 | 298 (61.6) |  |
| Injectables | 6 (4.4) |  |  | 15 (9.3) |  |  |  | 21 (7.0) |  |  |
| Pill | 20 (14.6) |  |  | 18 (11.2) |  |  |  | 38 (12.8) |  |  |
| Implants | 15 (10.9) |  |  | 26 (16.1) |  |  |  | 41 (13.8) |  |  |
| Condoms | 94 (68.6) |  |  | 102 (63.4) |  |  |  | 196 (65.8) |  |  |
| IUD | 2 (1.5) |  |  | 0 (0.0) |  |  |  | 2 (0.7) |  |  |
| Systematic condom uses in the last six months |  |  |  |  |  |  |  |  |  | 0 |
| No | 110 (46.6) | 40.1 | 53.2 | 106 (42.7) | 36.5 | 49.2 | NA | 216 (44.6) | 0.392 |  |
| Yes | 126 (53.4) | 46.8 | 59.9 | 142 (57.3) | 50.8 | 63.5 | 268 (55.4) |  |
| Occurrence of pregnancy in the last 12 months |  |  |  |  |  |  |  |  |  | 0 |
| No | 173 (73.3) | 67.2 | 78.8 | 209 (84.3) | 79.1 | 88.6 | NA | 382 (78.9) | **0.003**** |  |
| Yes | 63 (26.7) | 21.2 | 32.8 | 39 (15.7) | 11.4 | 20.9 | 102 (21.1) |  |
| The outcome of the pregnancy |  |  |  |  |  |  |  |  |  | 0 |
| FSW has not given birth | 31 (49.2) | 36.4 | 62.1 | 17 (43.6) | 27.8 | 60.4 | NA | 48 (47.1) | 0.581 |  |
| FSW has given birth | 32 (50.8) | 37.9 | 63.6 | 22 (56.4) | 39.6 | 72.2 | 54 (52.9) |  |
| Reasons why FSW did not give birth |  |  |  |  |  |  |  |  |  | 1 |
| Miscarriage | 15 (48.4) | 30.2 | 66.9 | 9 (56.3) | 29.9 | 80.2 | NA | 24 (51.1) | 0.609 |  |
| Abortion | 16 (51.6) | 33.1 | 69.8 | 7 (43.8) | 19.8 | 70.1 | 23 (48.9) |  |

**n**: number in category; **N**: total number; **P**: significance; ******: significant at 1%; **CI**: confidence interval; **lb**: lower bound; **ub**: upper bound; NA: not applicable.
