# Supplementary material for: Beyond the Pill: Contextual Effects of Community-Based PrEP Delivery on Pregnancy Risk among FSWs in Cameroon – A Propensity Score-Matched Analysis
Source: Research Square preprint supplement (doi:10.21203/rs.3.rs-7322262/v1), 2025-09-15
Supplement: Supplementary file 2 [file 1e2b746ea5af991510d545eb.docx]

**Checking bias for the chosen model after PSM**

Regarding checking bias for the chosen model after PSM, there was no influentials cases because both Cook’s distance and Leverage were lower than 1 and no case had twice the value of Leverage. However, there were some outliers; in fact, absolute value of DFBeta predictors were less than 1 except for constant and PrEP intervention with respectively (figure 4). Concerning analysis of standardized residuals (ZRE), less than 5% (4.5%) is out of ±1.96 and less than 1% (0.6%) is out of ±2.58. Also, zero cases warrant further inspection because their ZRE greater than 3.

1.Cook's distance; 2. Leverage; 3. DFBETA for constant ; 4.DFBETA Being on PrEP; 5. DFBETA for Age; 6. DFBETA being PrEP by Âge

**Figure 4.** influentials cases and outliers (DFBeta)

Linearity of the log link function for the continuous variable “Age” was assessed by including an interaction term between Age and its natural logarithm (Age × ln(Age)) in the Poisson model. The interaction term was not statistically significant (p > 0.05), supporting the assumption of a linear relationship on the log scale.

Regarding multicollinearity after PSM,The VIF values are well below 10 and the tolerance statistics are well above 0.2. The average VIF, obtained by adding the VIF values for each predictor and dividing by the number of predictors (k), is also very close to 1 (Table i)

**Table i**

| **Coefficientsa** | | | | | | | | |
| --- | --- | --- | --- | --- | --- | --- | --- | --- |
| Modèle | | Coefficients non standardisés | | Standardized Coefficients | t | Sig. | Collinearity statistics | |
| B | Standard error | Bêta | Tolérance | VIF |
| 1 | (Constante) | .153 | .431 |  | .354 | .723 |  |  |
| Âge du répondant | .004 | .018 | .016 | .213 | .832 | 1.000 | 1.000 |
| 2 | (Constante) | .040 | .438 |  | .092 | .927 |  |  |
| Âge du répondant | .010 | .019 | .044 | .559 | .577 | .929 | 1.076 |
| est sous PrEP | -.090 | .067 | -.104 | -1.328 | .186 | .929 | 1.076 |
| a. Variable dépendante : Grossesse au cours des 12 derniers mois | | | | | | | | |

**Age of respondent** (100% on the dimension 3) and **Being on PrEP** (90% on the dimension 2) have the bulk of their variance associated with different eigenvalues, suggesting that they are not collinear (Table ii)

**Table ii**

| **Diagnostics of collinearitya** | | | | | | |
| --- | --- | --- | --- | --- | --- | --- |
| Model | Dimension | Eigenvalue | Condition Index | Variance Proportions | | |
| (Constant) | Age of respondent | Being on PrEP |
| 1 | 1 | 1.997 | 1.000 | .00 | .00 |  |
| 2 | .003 | 26.429 | 1.00 | 1.00 |  |
| 2 | 1 | 2.624 | 1.000 | .00 | .00 | .05 |
| 2 | .374 | 2.650 | .00 | .00 | .90 |
| 3 | .003 | 31.132 | 1.00 | 1.00 | .05 |
| a. Dependant variable : Pregnancy occurrence during last twelve month | | | | | | |
